# Supplementary material for: Regulating local chemical softness of the collector to homogenize Li deposition for anode-free Li-metal batteries
Source: Royal Society of Chemistry journal article supplement (doi:10.1039/d4ee03673e), 2024-01-01
Supplement: d4ee03673e1.pdf [file d4ee03673e1.pdf]

## Supporting information

### Regulating local chemical softness of collector to homogenize Li deposition for anode-free Li-metal batteries

Jiaming Zhu<sup>1</sup>, Cong Kang<sup>1</sup>, Xiangjun Xiao<sup>1</sup>, Ya Mao<sup>2</sup>, Ying Luo<sup>2</sup>, Yuheng Wang<sup>3</sup>, Quansheng Zhang<sup>3</sup>, Yulin Ma<sup>1</sup>, Chunyu Du<sup>1</sup>, Shuaifeng Lou<sup>1</sup>, Fanpeng Kong<sup>1,4,\*</sup>, Jingying Xie<sup>2,\*</sup>, Geping Yin<sup>1,\*</sup>

1. State Key Laboratory of Space Power-Sources, School of Chemistry and Chemical Engineering, Harbin Institute of Technology, Harbin 150001, China.

2. Shanghai Institute of Space Power-Sources, Shanghai 200245, China.

3. School of Chemical and Environmental Engineering, Shanghai Institute of Technology, Shanghai 201418, China.

4. Chongqing Research Institute of HIT, Chongqing 401135, China.

\*Corresponding author: E-mail: yingeping@hit.edu.cn (G, Yin), fpkong@hit.edu.cn (F. Kong), jyxie@mail.sim.ac.cn (J, Xie)

#### Equation

$$\varphi(E) = -4.44 + W_f \quad (1)$$

$$t_{Li^+} = \frac{I_{SS}(\Delta V - I_0 R_0)}{I_0(\Delta V - I_{SS} R_{SS})} \quad (2)$$

#### Table

**Table S1. Energy barrier during lithium atom diffusion process.**

| matrices | formation energy barrier | fracture energy barrier |
|----------|--------------------------|-------------------------|
| Co/NC    | 0.38                     | 0.61                    |
| Fe/NC    | 0.42                     | 0.64                    |

| matrices | formation energy barrier | fracture energy barrier |
|----------|--------------------------|-------------------------|
| Co/NC    | 0.40                     | 0.63                    |
| Cr/NC    | 0.41                     | 0.62                    |
| V/NC     | 0.53                     | 0.64                    |

**Table S2.** Adsorption energy between carbon atom and lithium atom

| matrices | slab+Li | slab    | $\Delta E$ |
|----------|---------|---------|------------|
| Co/NC    | -448.62 | -446.70 | -1.62      |
| Cr/NC    | -450.82 | -449.17 | -1.35      |
| Fe/NC    | -449.33 | -447.81 | -1.22      |
| Mn/NC    | -450.34 | -448.92 | -1.12      |
| V/NC     | -449.74 | -448.08 | -1.36      |
| NC       | -438.21 | -437.41 | -0.50      |

**Table S3.** Nucleation overpotential ( $\eta_n$ ) and growth overpotential ( $\eta_g$ ) on different matrices

| matrices | $\eta_n$ | $\eta_g$ | $\Delta\eta$ |
|----------|----------|----------|--------------|
| Co-SAs   | 25.70    | 8.30     | 17.40        |
| FeSAs    | 26.00    | 10.50    | 15.50        |
| VSAs     | 28.20    | 15.50    | 12.70        |
| NiSAs    | 30.00    | 9.90     | 20.10        |
| CrSAs    | 30.00    | 15.50    | 14.50        |
| MnSAs    | 32.80    | 19.20    | 13.60        |
| NC       | 26.00    | 14.20    | 11.80        |
| Cu       | 48.90    | 9.60     | 39.30        |

**Table S4.** Energy densities of different cell

| cathode | anode | N/P | pecific energy ( $Wh\ kg^{-1}$ ) | vol. energy density ( $Wh\ L^{-1}$ ) |
|---------|-------|-----|----------------------------------|--------------------------------------|
| LFP     | Gr    | 1.1 | 212                              | 501.4                                |
| LFP     | Li    | 1   | 276.7                            | 661.6                                |
| LFP     | Li    | 0   | 280.7                            | 707.6                                |
| NCM     | Gr    | 1.1 | 361                              | 954.4                                |
| NCM     | Li    | 1   | 537.8                            | 1545.8                               |
| NCM     | Li    | 0   | 550.8                            | 1772.4                               |

## Figures

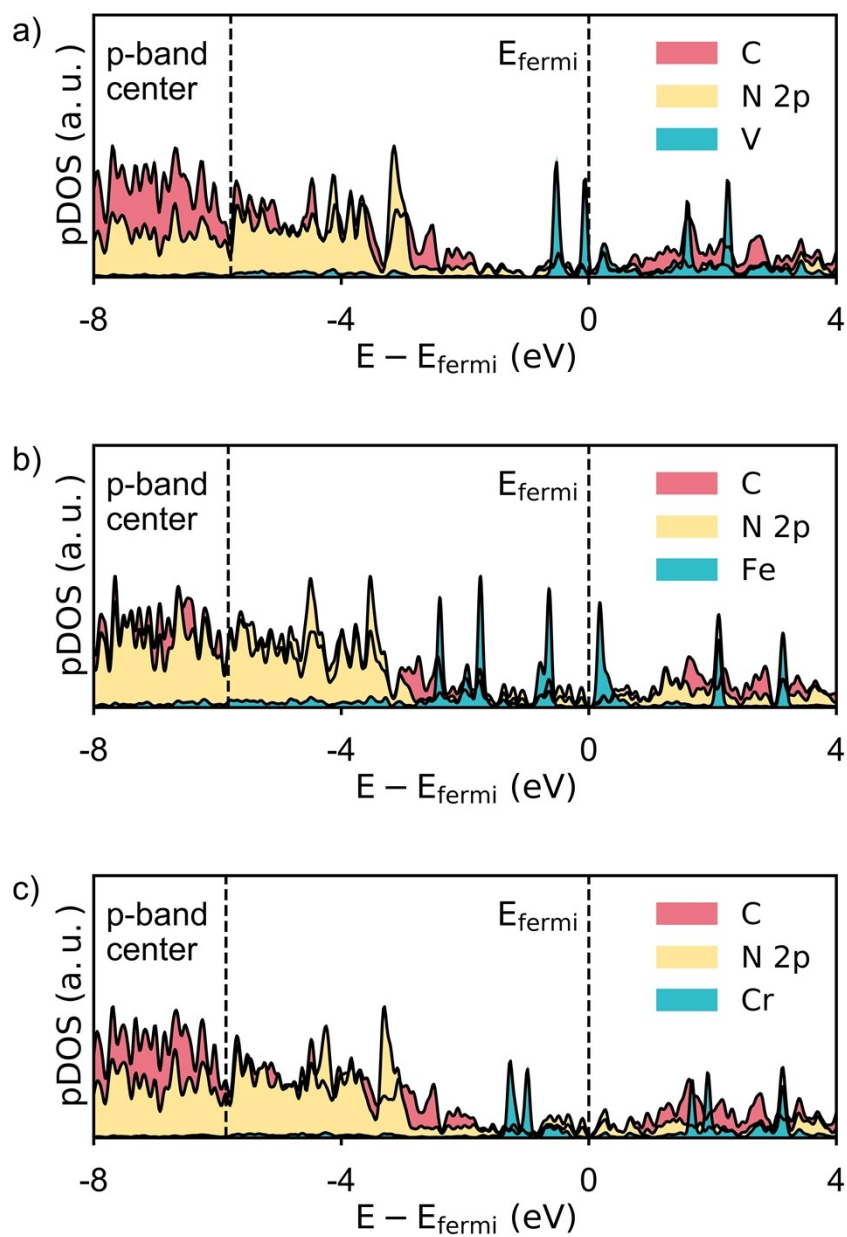

**Figure S1.** Projected DOS (PDOS) for C, N 2p orbitals and V/Fe/Cr 3d orbitals including V/NC, Fe/NC and Cr/NC.

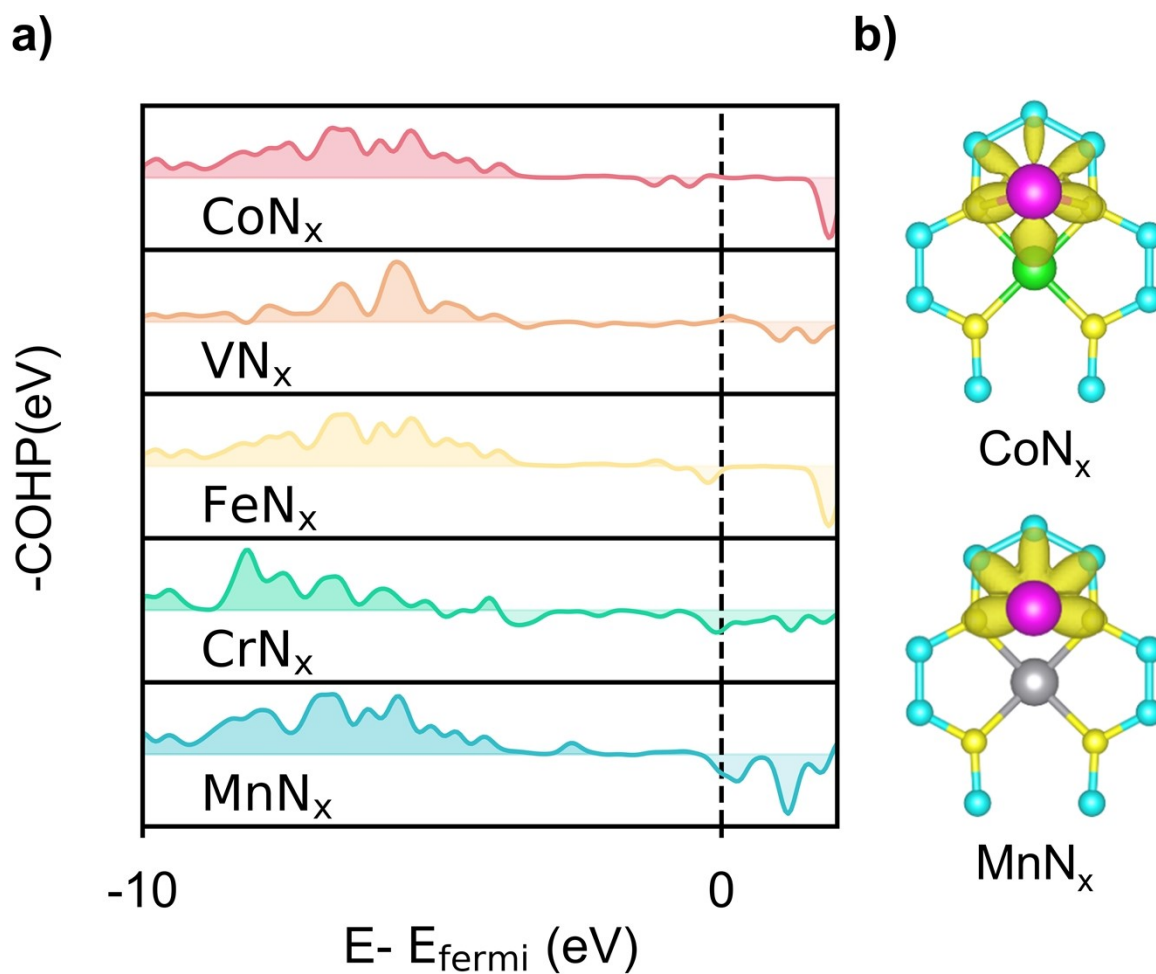

**Figure S2.** (a) Crystal orbital Hamilton population (-COHP) of Li adsorbed on different matrices. The area above the horizontal axis represents bonding states. (b) Hirshfeld surface of Li adsorbed on the Co/NC and Mn/NC.

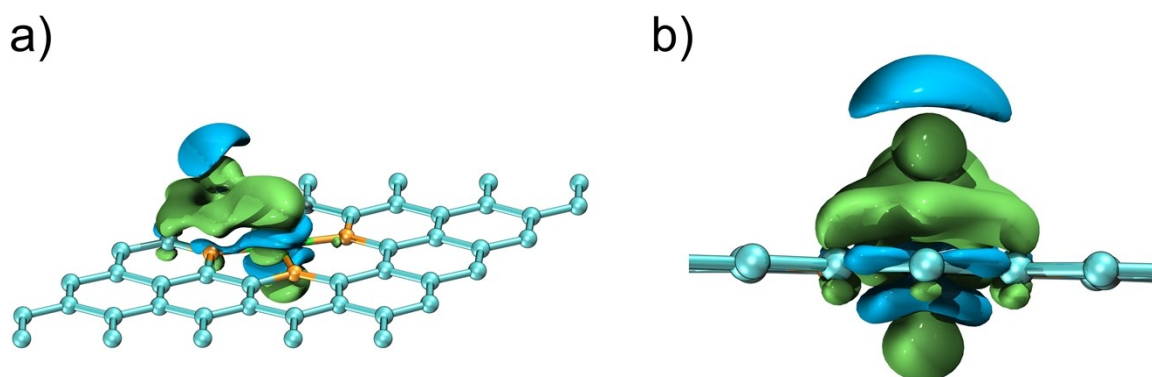

**Figure S3.** Differential charge density map of Li ion adsorption on Co/NC.

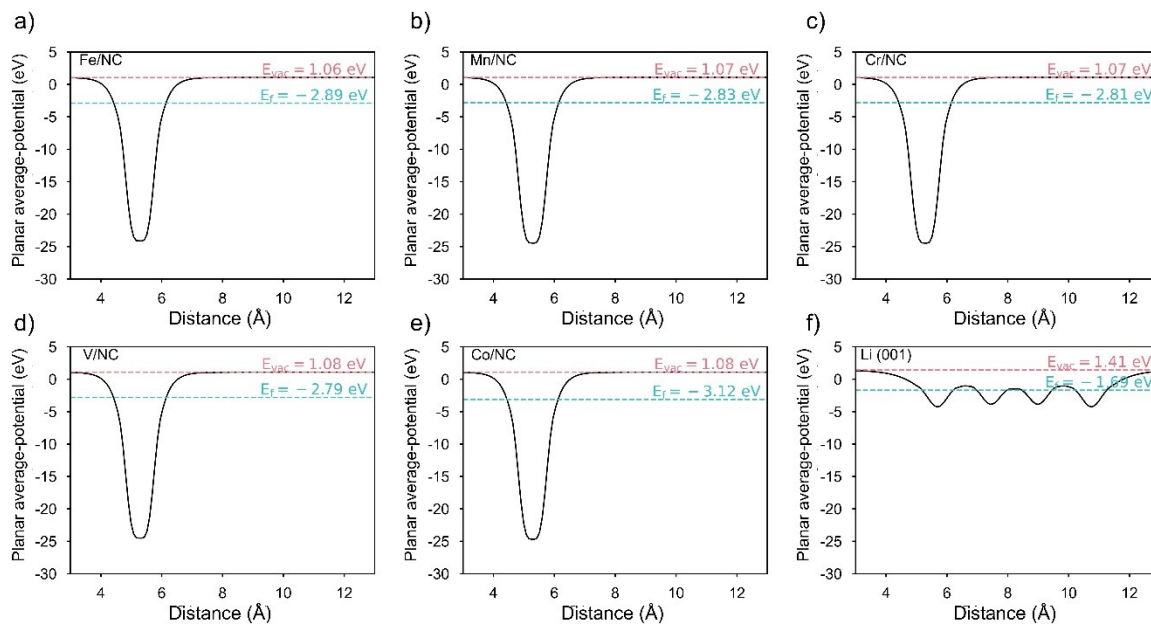

**Figure S4.** Surface work function (SWF) of different matrices.

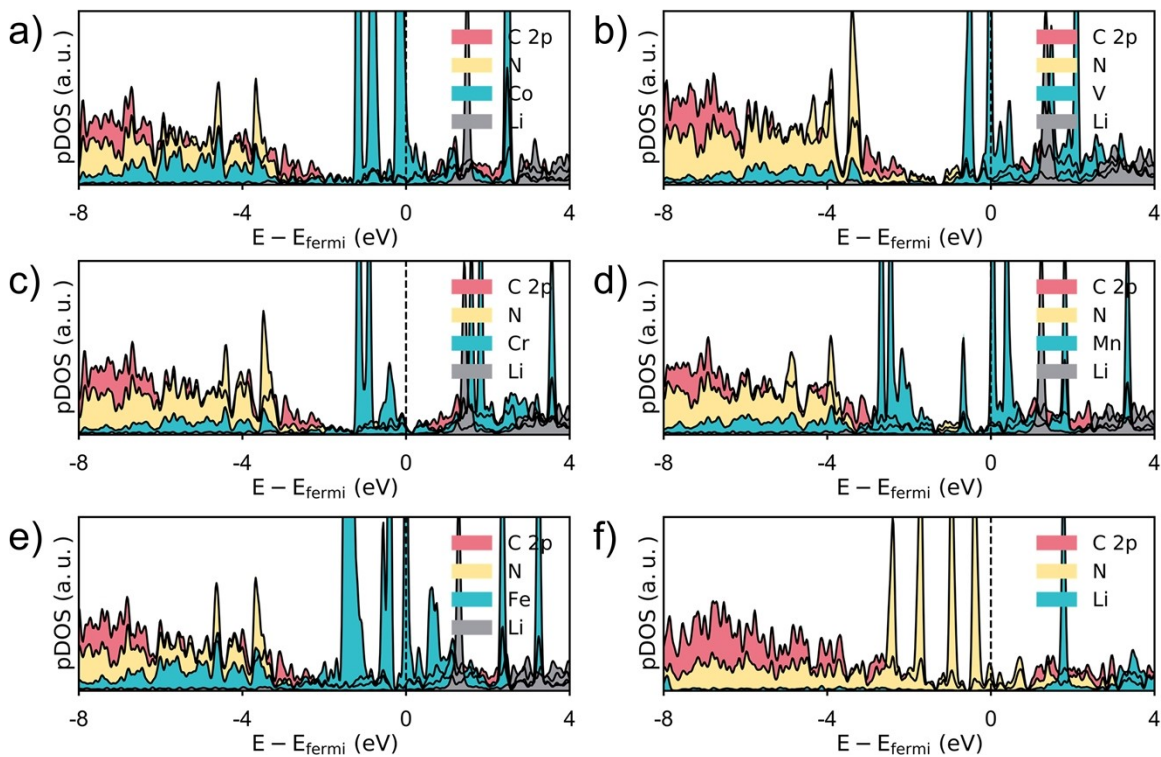

**Figure S5.** PDOS including (a) Co/NC, (b) V/NC, (c) Cr/NC, (d) Mn/NC, (e) Fe/NC, (f) NC.

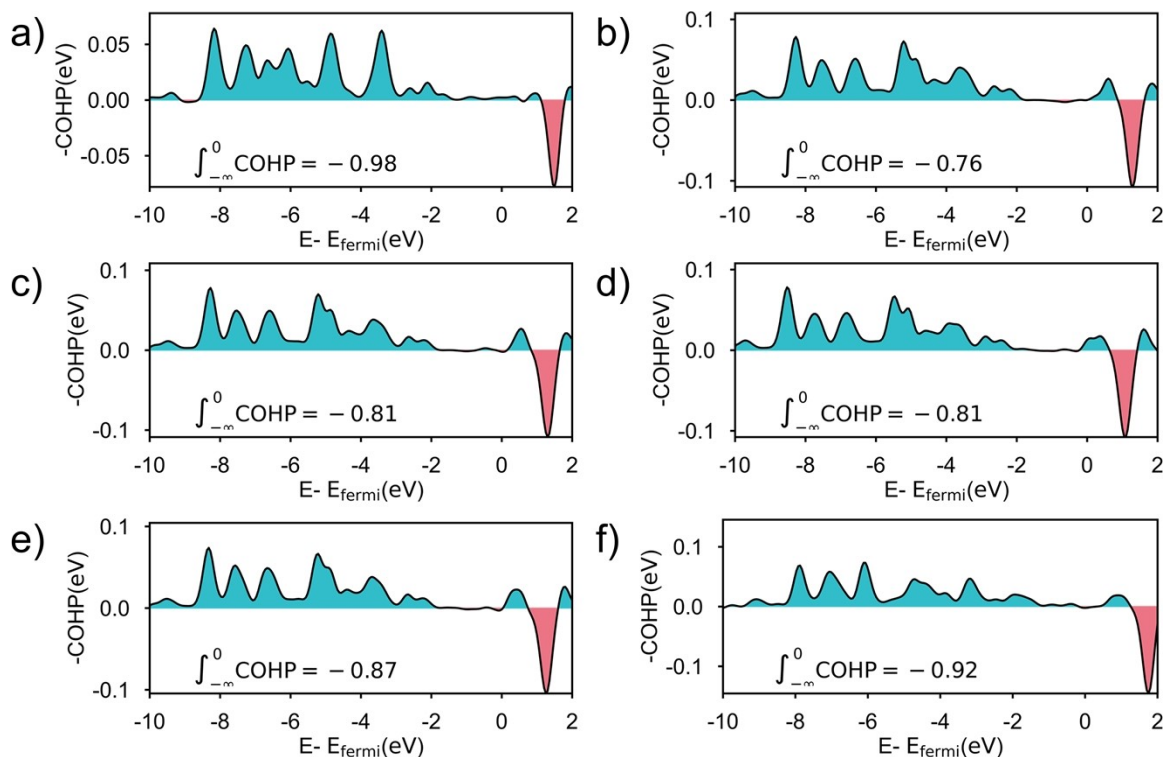

**Figure S6.** -COHP between C and Li atom including (a) Co/NC, (b) V/NC, (c) Cr/NC, (d) Mn/NC, (e) Fe/NC, (f) NC. The area above the horizontal axis represents bonding states.

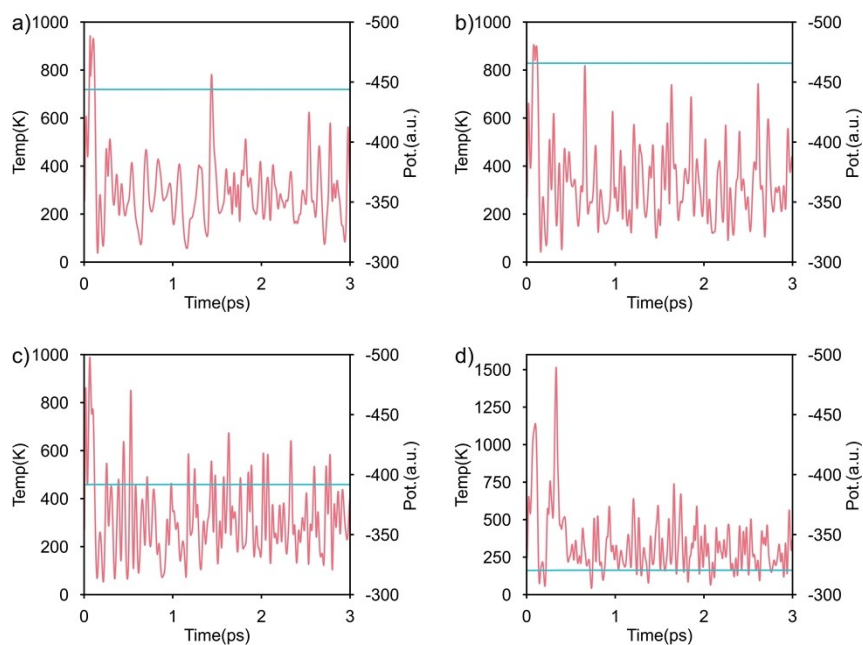

**Figure S7.** Variation of temperature and energy with time step for AIMD simulations on (a) Fe/NC, (b) Co/NC, (c) V/NC and (d) NC.

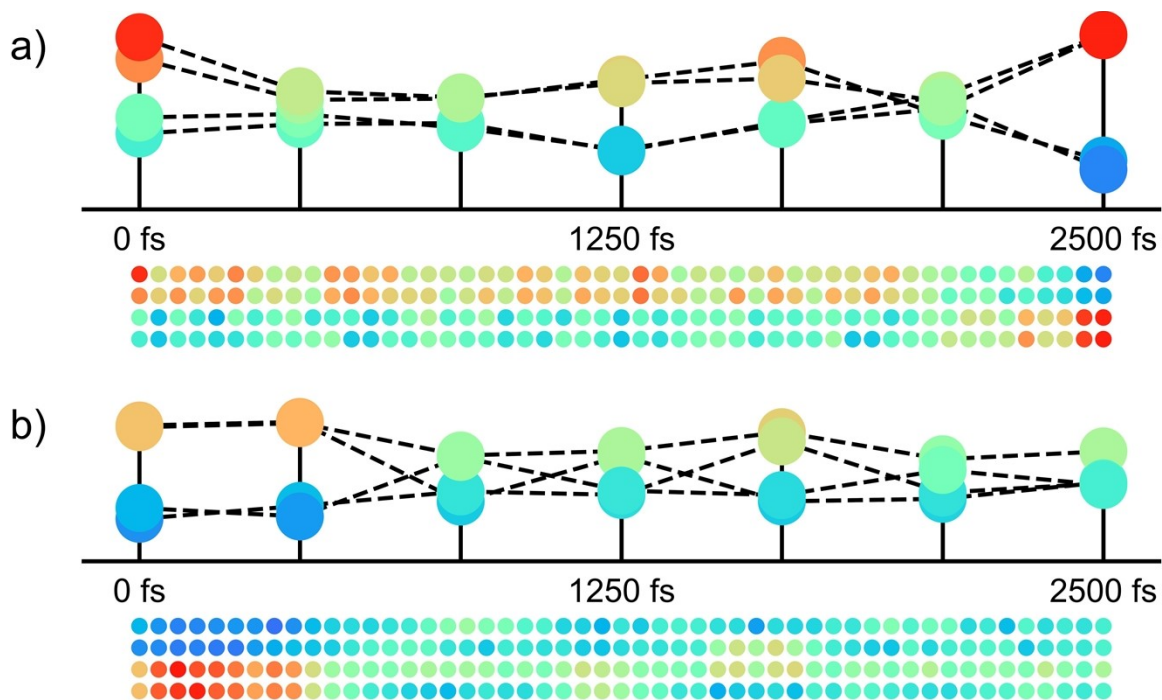

**Figure S8.** AIMD calculations of the lithium structure in relation to the temporal evolution of the Li-Li bond length on (a) V/NC, and (b) Fe/NC.

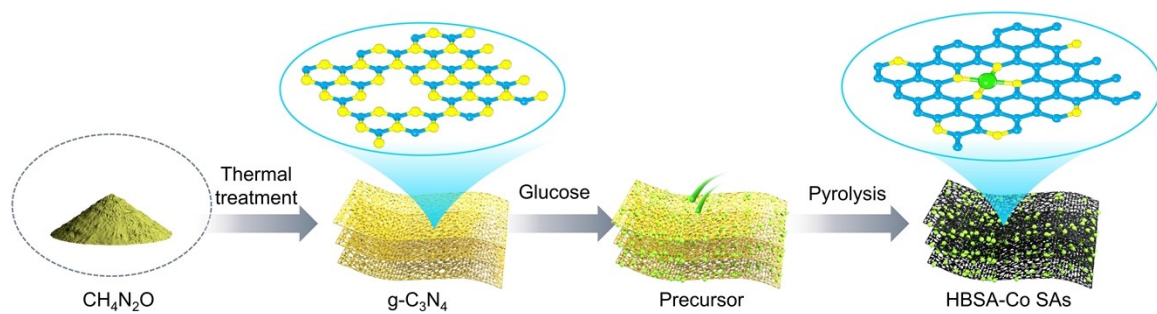

**Figure S9.** Schematic of the synthesis process for HBSA-Co SAs.



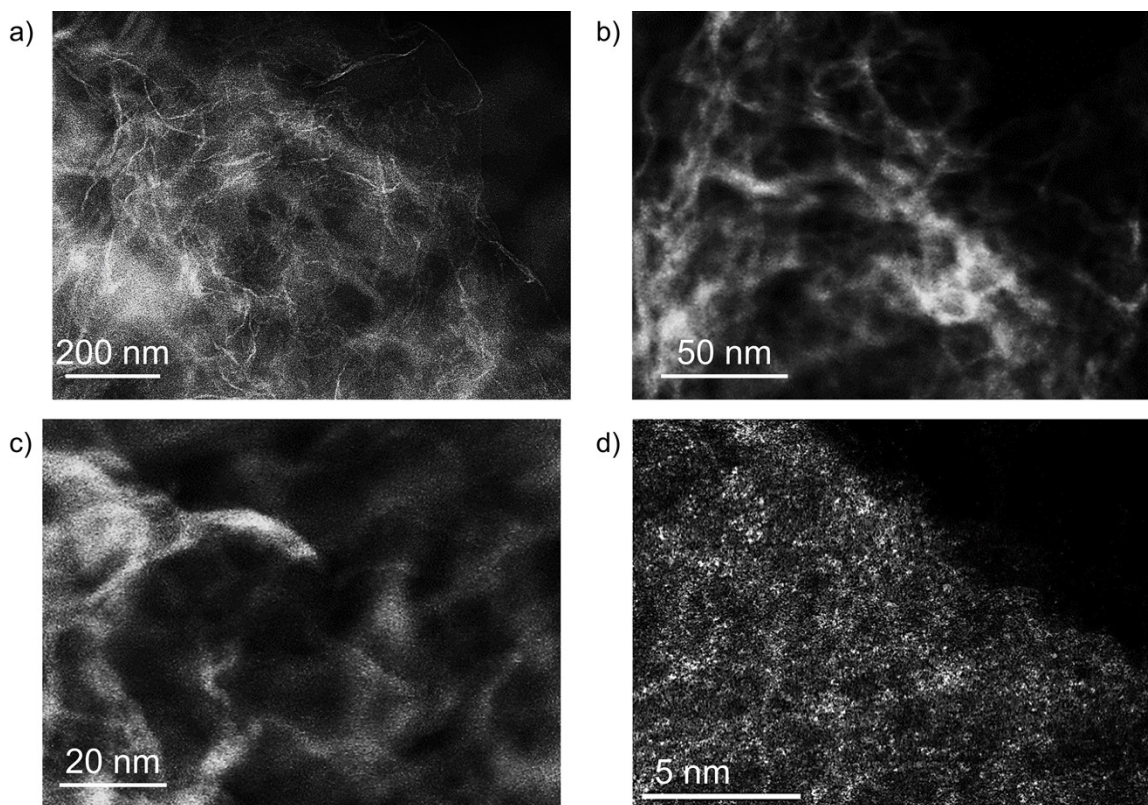

**Figure S10.** XRD patterns of (a) Co/NC, (b) Fe/NC, (c) Cr/NC, (d) NC.

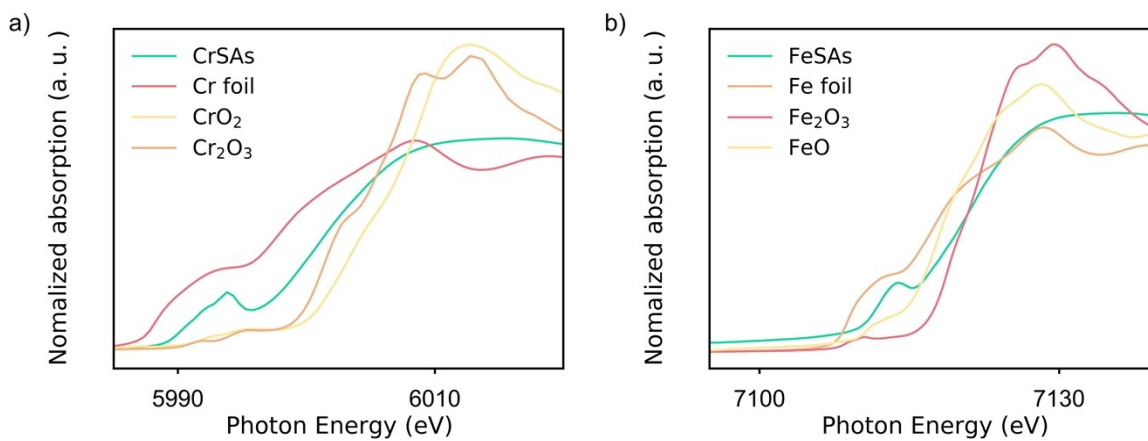

**Figure S11.** HAADF-STEM images of HBSA-Co SAs at different scales.

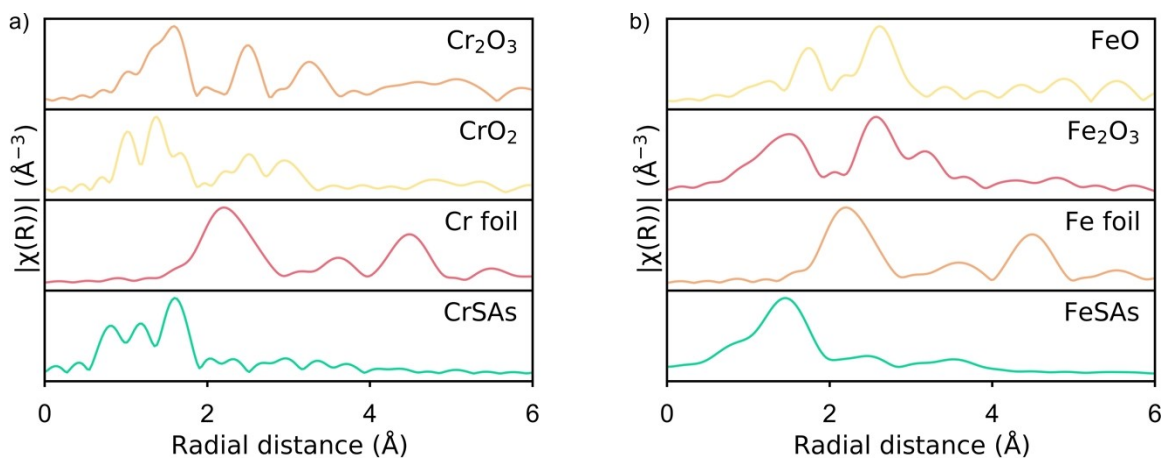

**Figure S12.** (a) Cr (b) Fe K-edge XANES spectra.

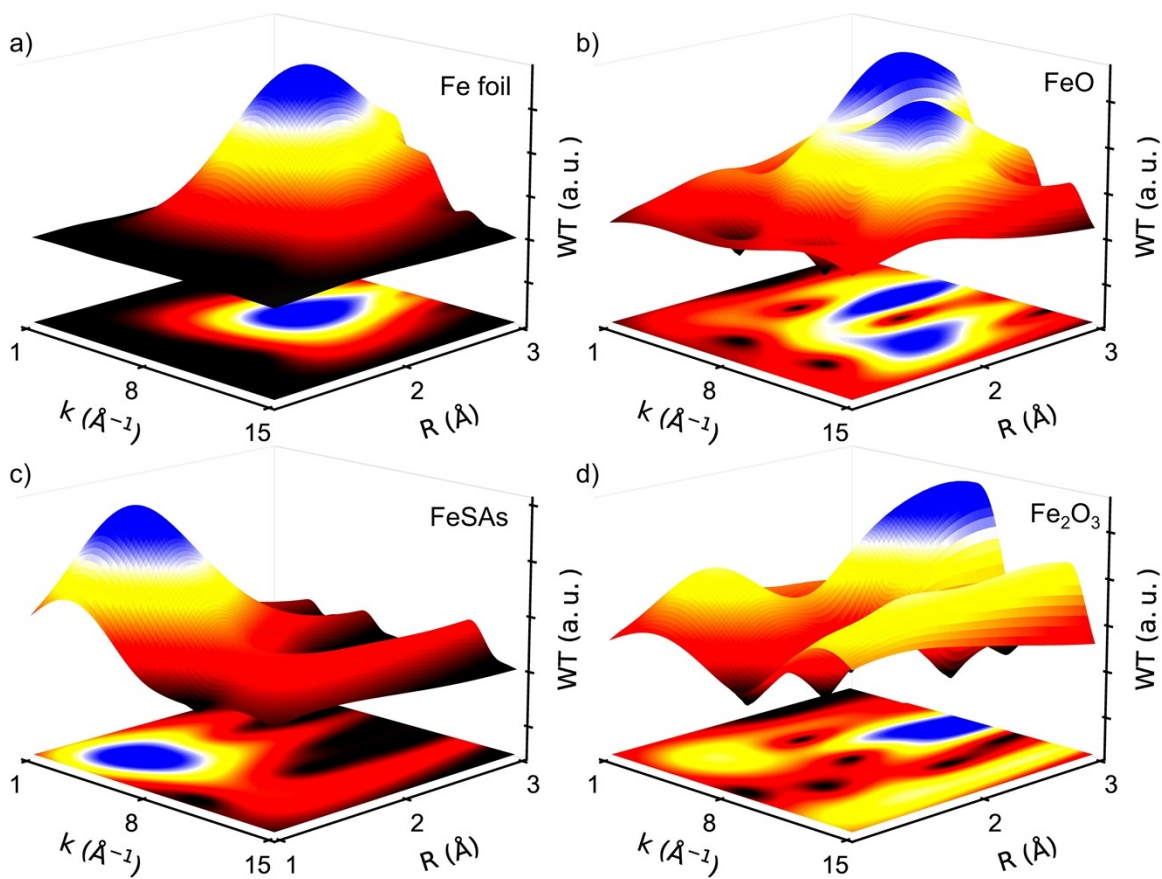

**Figure S13.** (a) Cr (b) Fe k<sup>3</sup>-weighted FT of EXAFS spectra.

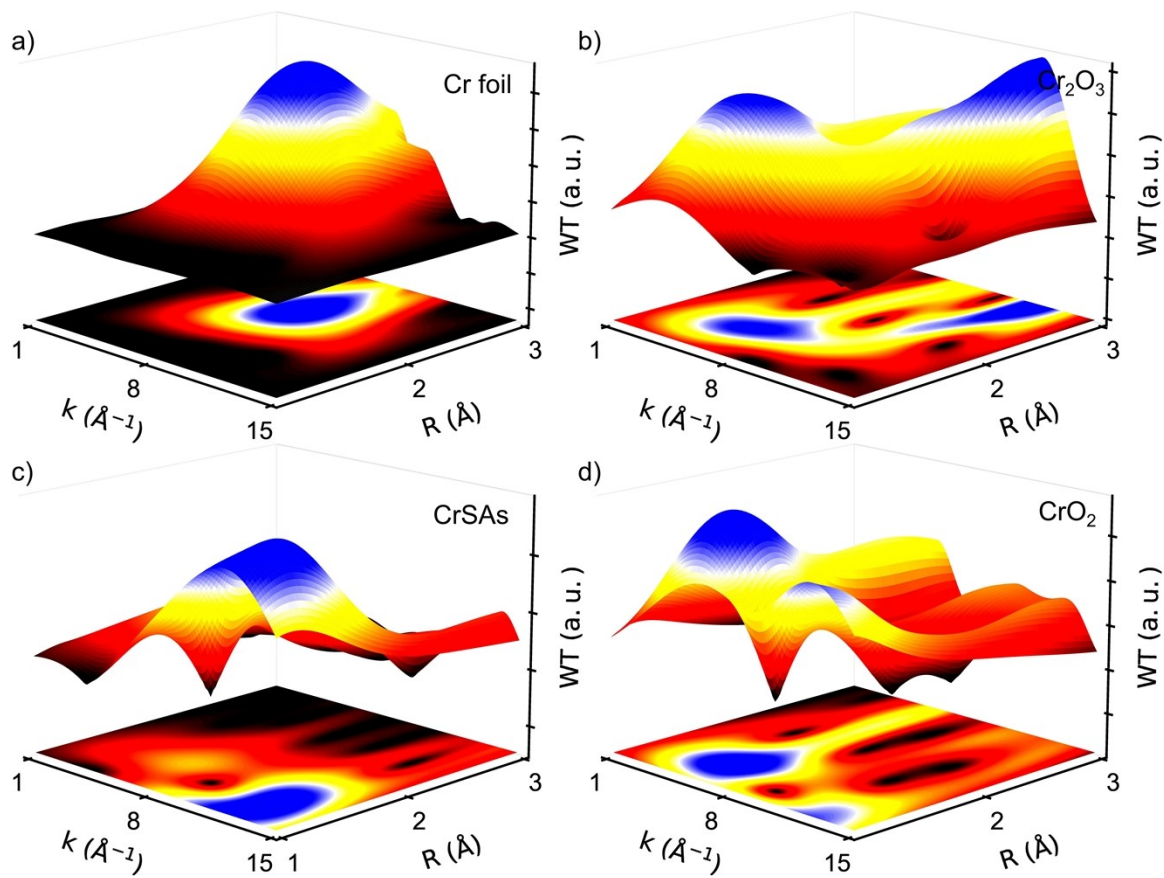

**Figure S14.** Fe K-edge WT-EXAFS spectra.

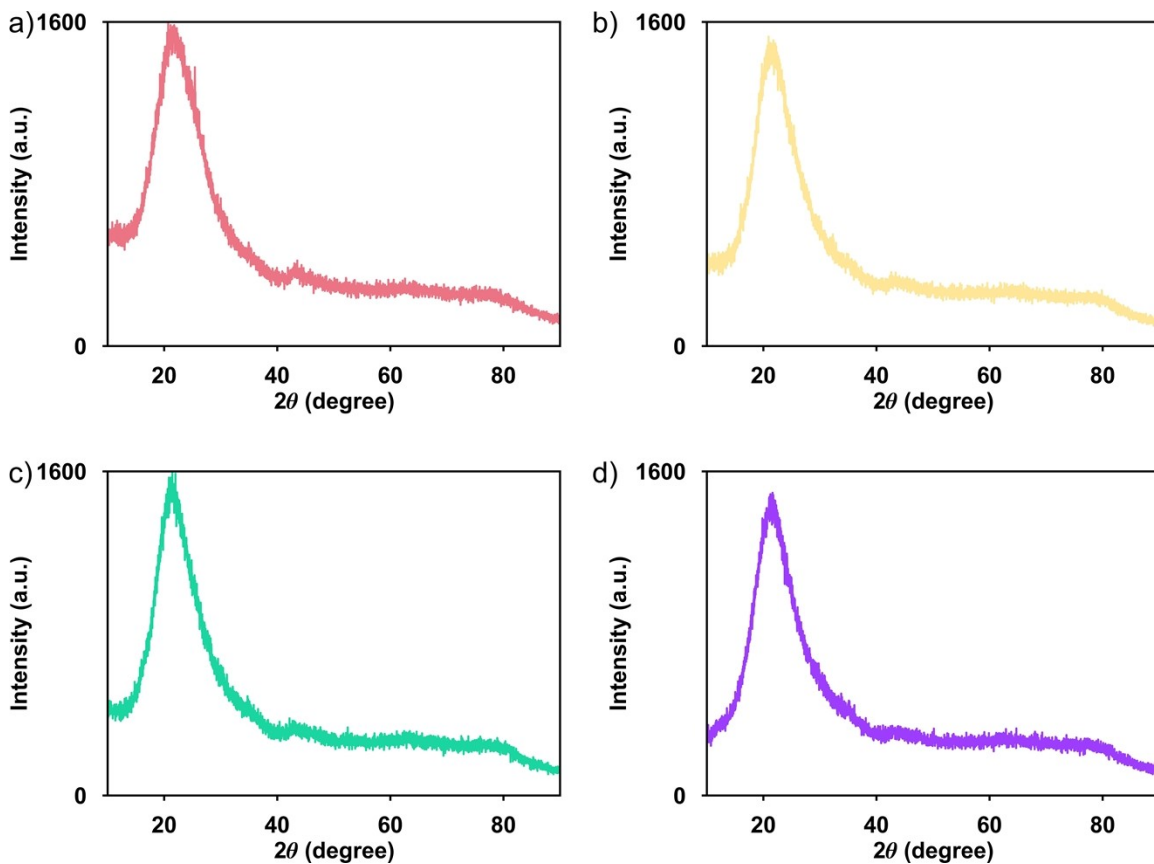

**Figure S15.** Cr K-edge WT-EXAFS spectra.

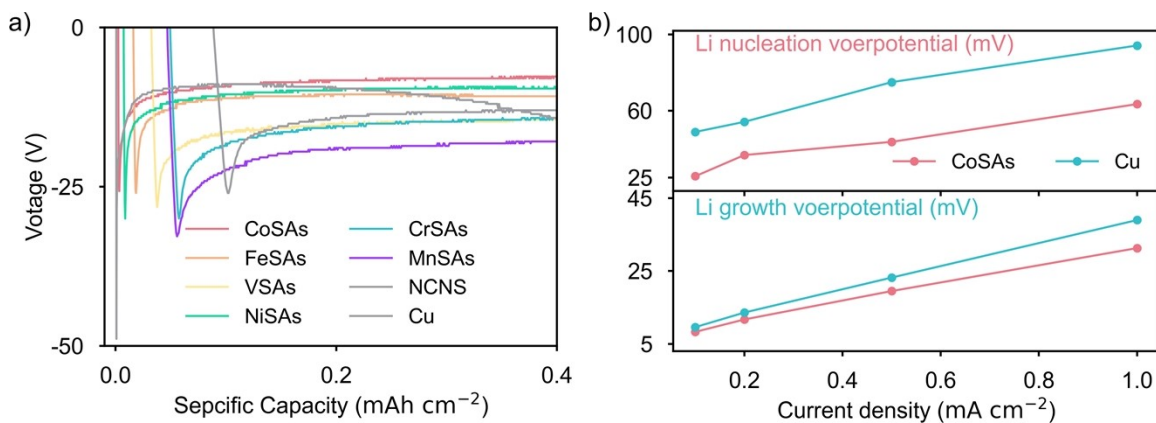

**Figure S16.** (a) First discharge curves on different matrices at  $0.1 \text{ mA cm}^{-2}$ ; First discharge curves on (b) Relative nucleation overpotential ( $\eta_n$ ) and growth overpotential ( $\eta_g$ ) on HBSA-Co SAs and Cu foil at different current densities ( $0.1, 0.2, 0.5, 1.0 \text{ mA cm}^{-2}$ ).



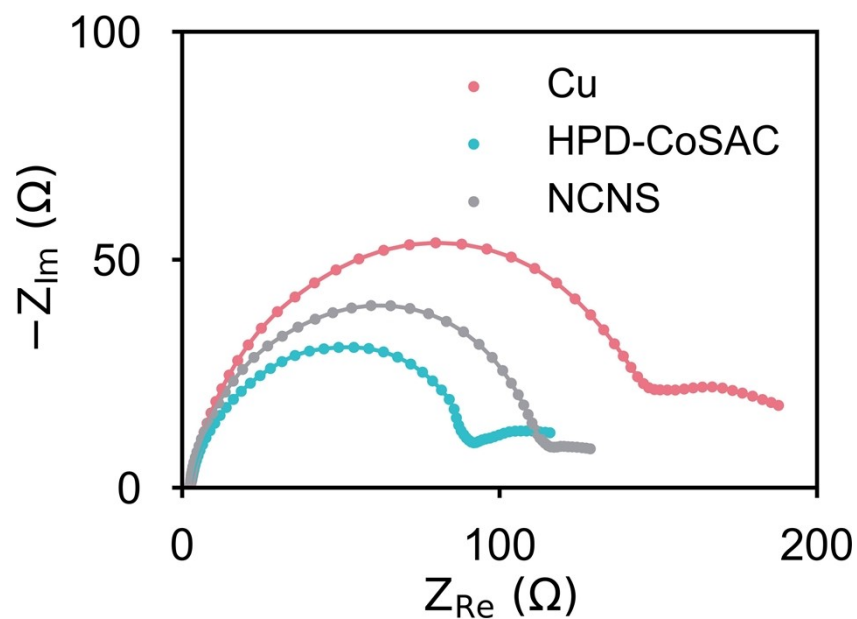

**Figure S17.** Nyquist plots taken on the HBSA-Co SAs, NC and Cu foil

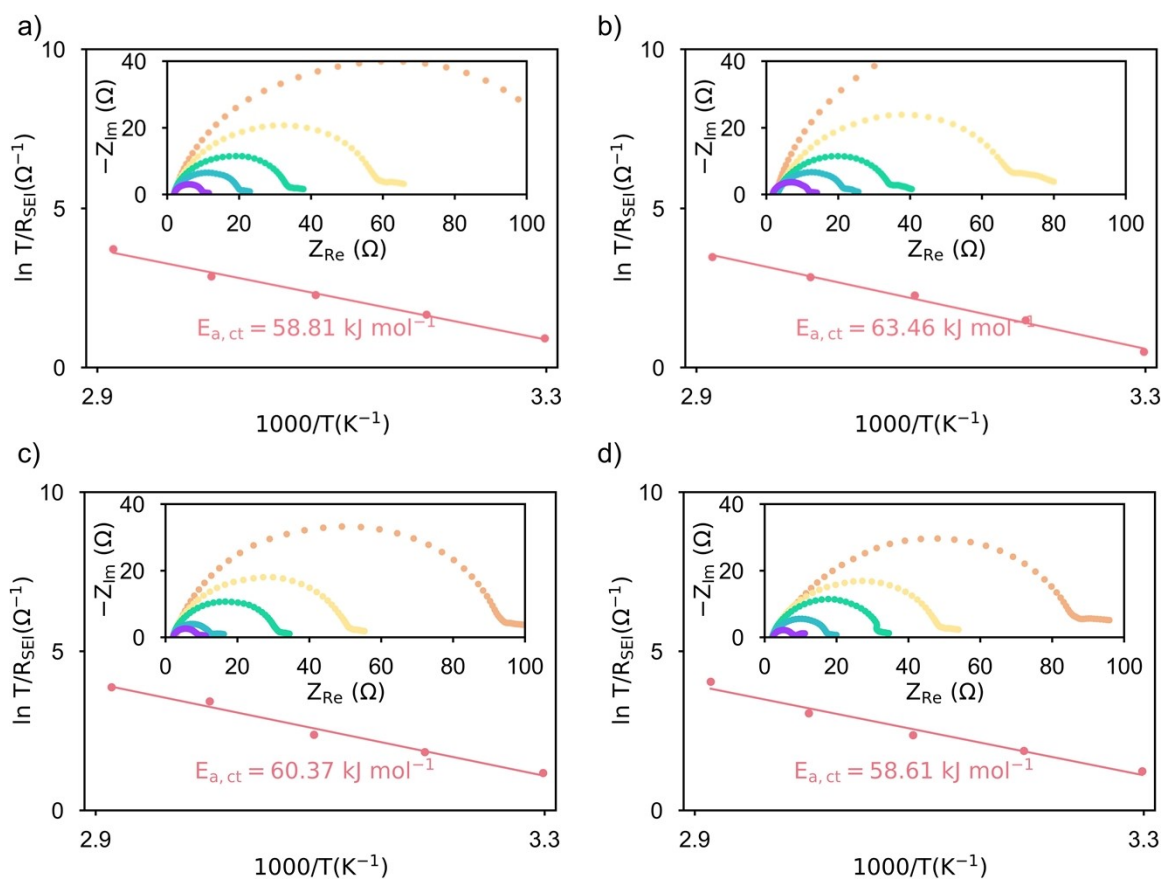

**Figure S18.** Temperature-dependent Nyquist plots taken on the (a) Li ⊂ NC, (b) Li ⊂ Cu foil, (c) Li ⊂ Fe-SAs and (d) Li ⊂ Cr-SAs.

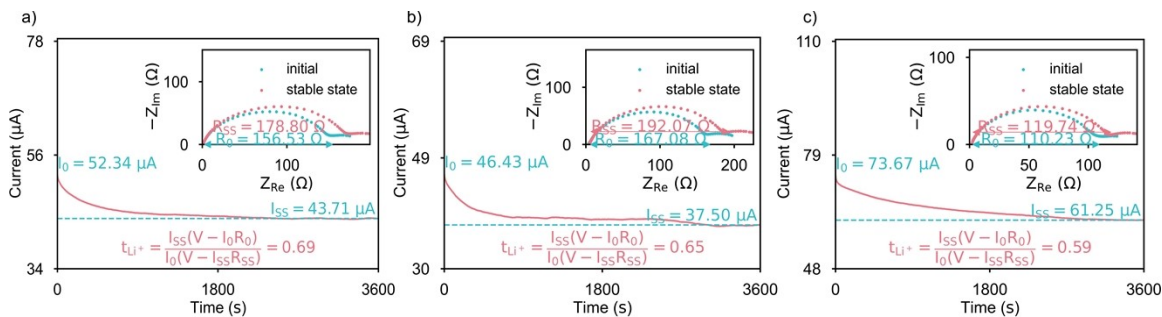

**Figure S19.** Chronoamperometric  $i$ - $t$  and Nyquist plots taken on the (a)  $\text{Li}^+$  HBSA-Co SAs (b)  $\text{Li}^+$  NC (c)  $\text{Li}^+$  Cu foil symmetrical cell.

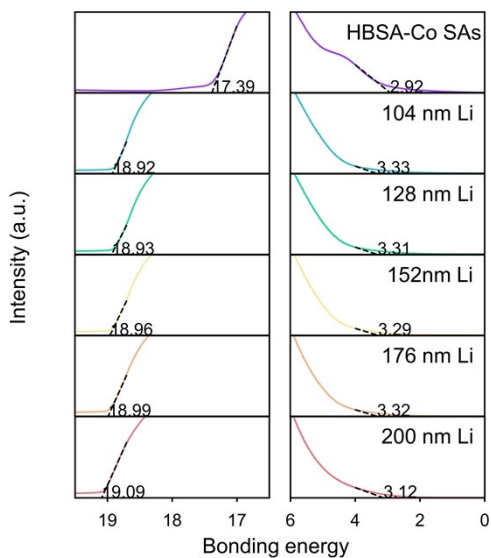

**Figure S20.** UPS spectra at states after etching for different times.

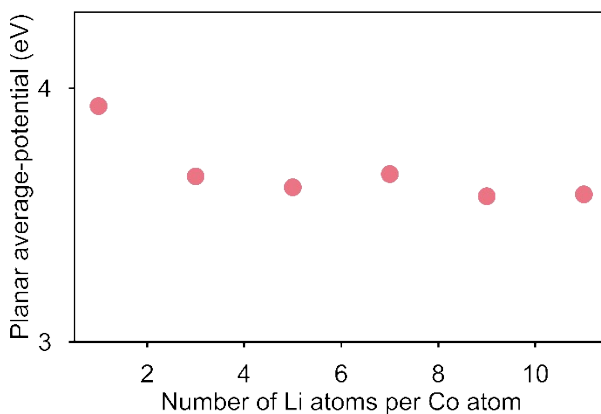

**Figure S21.** Surface work function (SWF) with different number of lithium atoms.

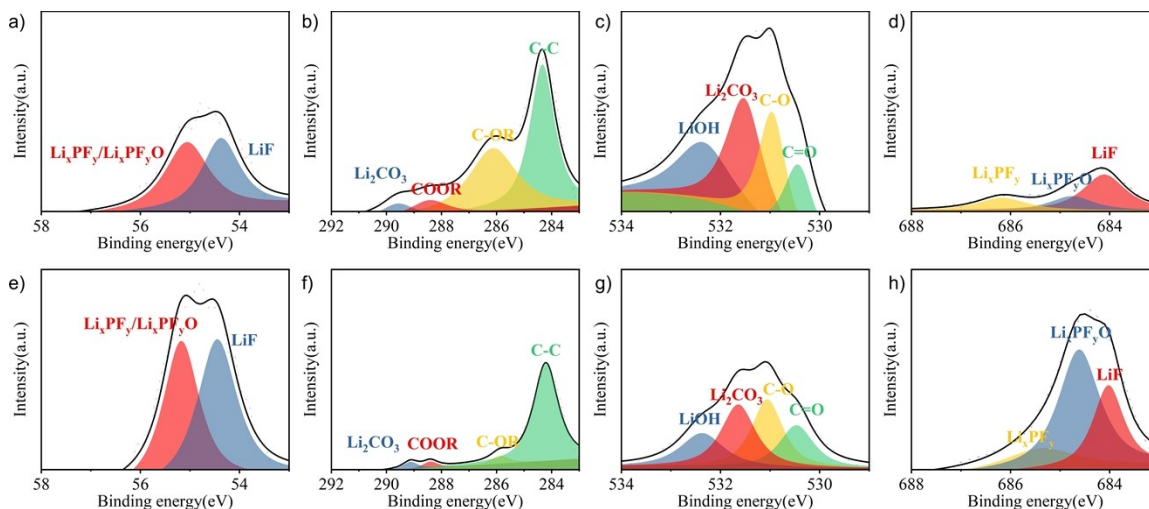

**Figure S22.** XPS spectra of lithium anode surface of (a~d) Cu current collector and (e~h) HBSA-Co SAs current collector after depositing  $1 \text{ mAh cm}^{-2}$  of lithium metal.

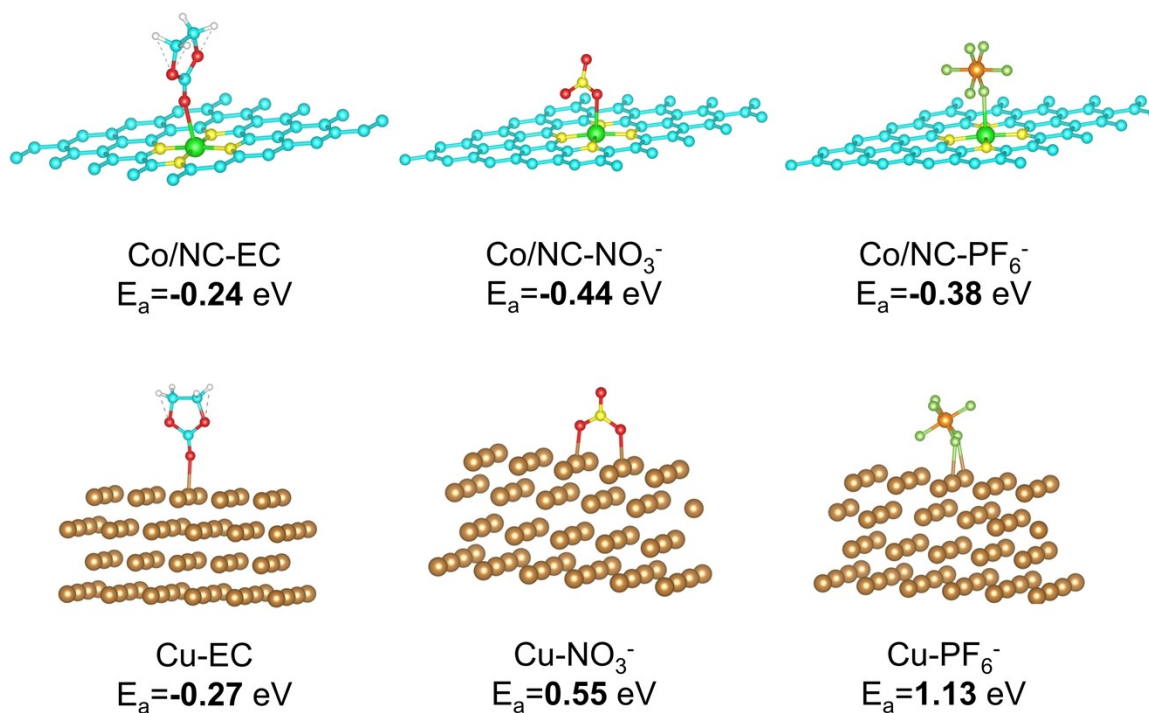

**Figure S23.** Adsorption energies of different molecules on Co single atoms and copper foil.

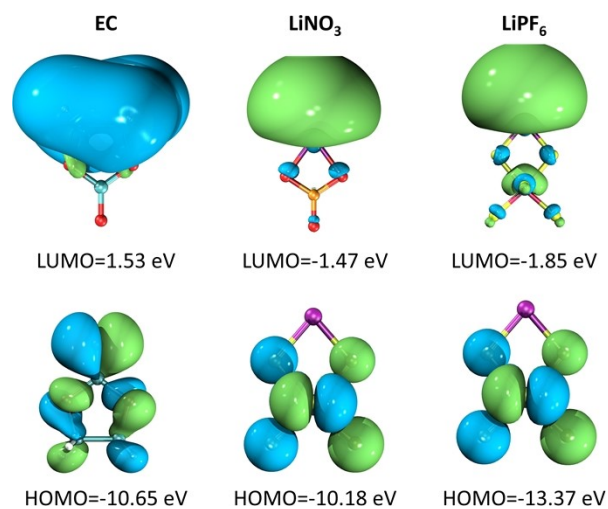

**Figure S24.** Calculation of HOMO and LUMO for different molecules.

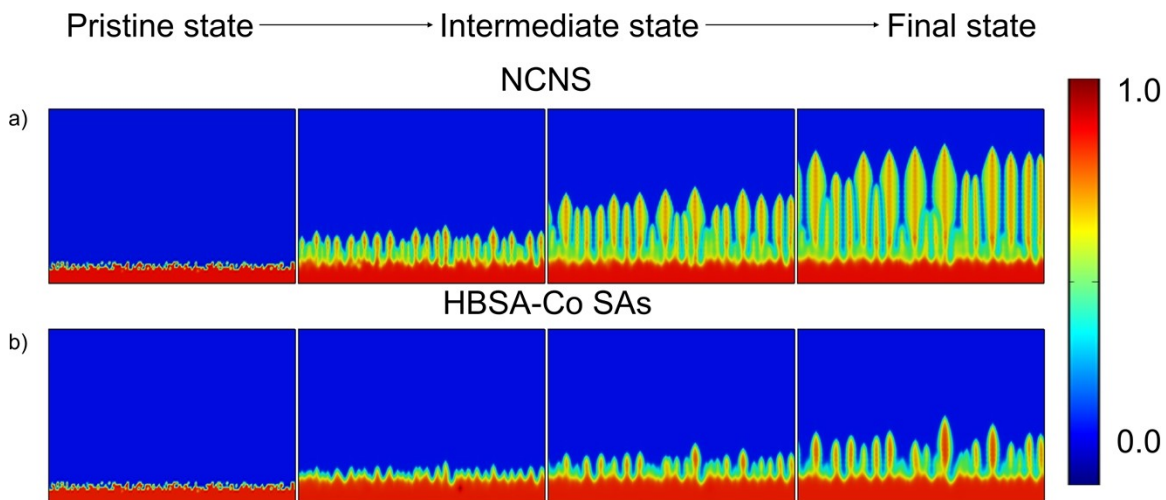

**Figure S25.** The evolution of line growth Li deposition morphology over time from phase field model.



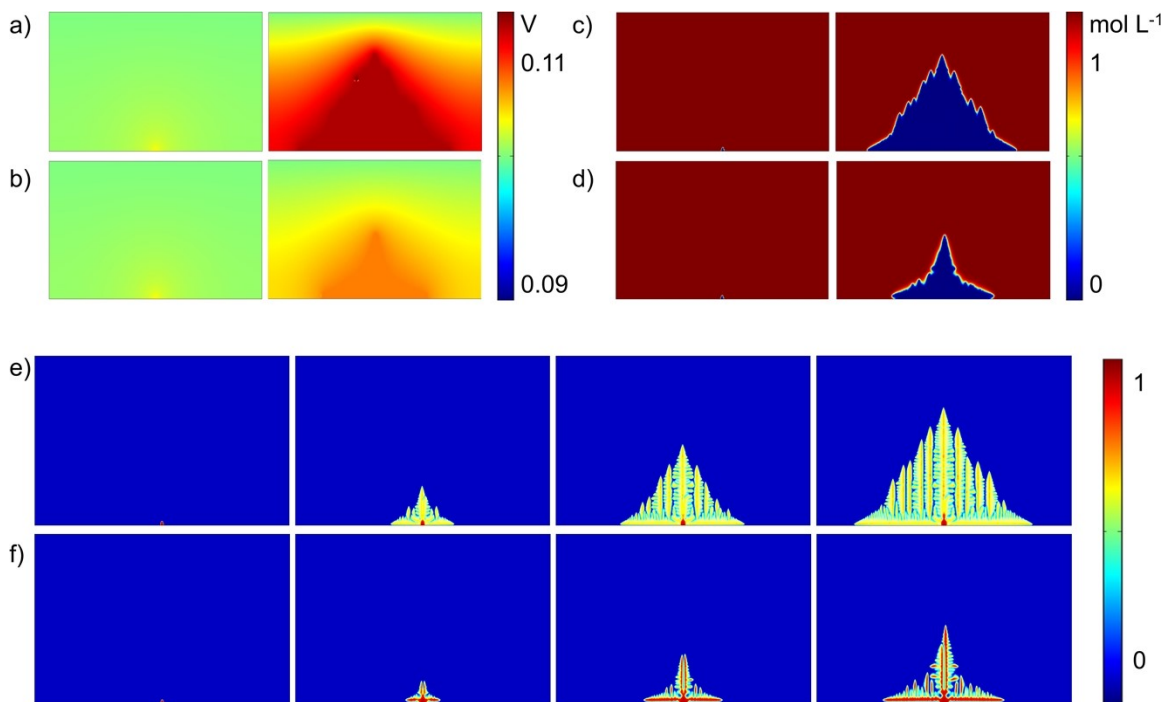

**Figure S26.** The evolution of point growth Li deposition morphology, internal electric field, and concentration field over time from phase field model.

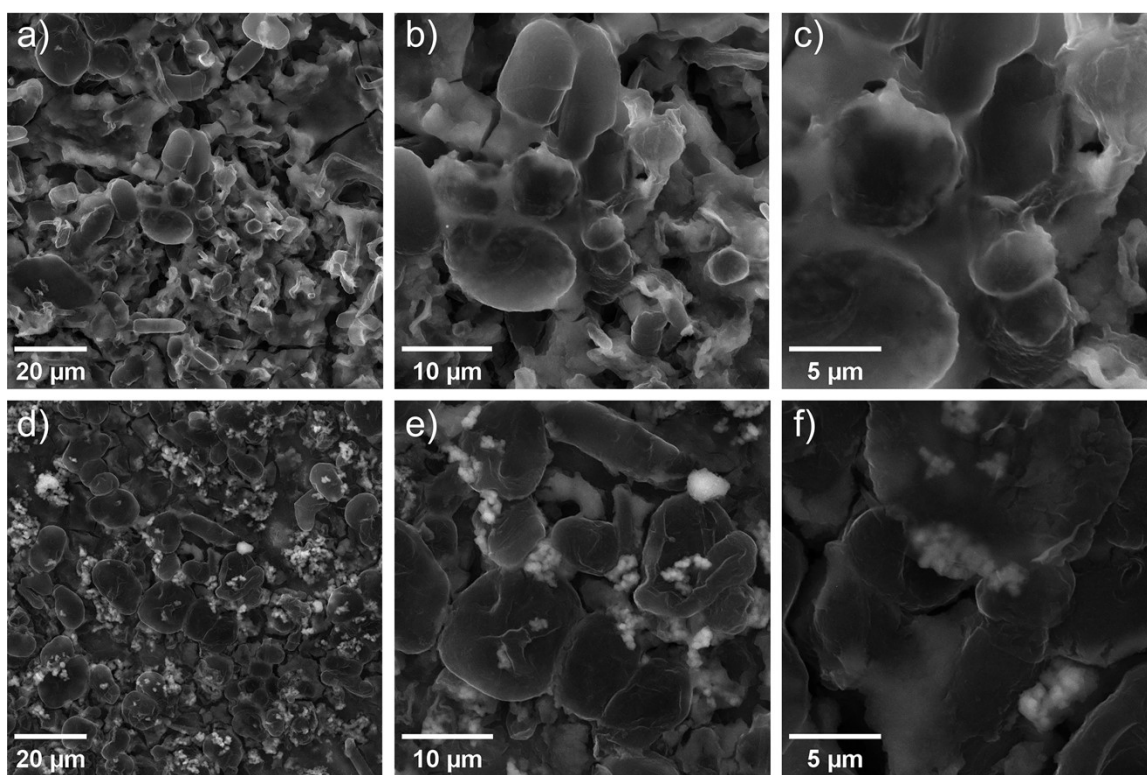

**Figure S27.** SEM images at different scales of (a~c) Cu current collector and (d~f) HBSA-Co SAs current collector after depositing  $1 \text{ mAh cm}^{-2}$  of lithium metal.

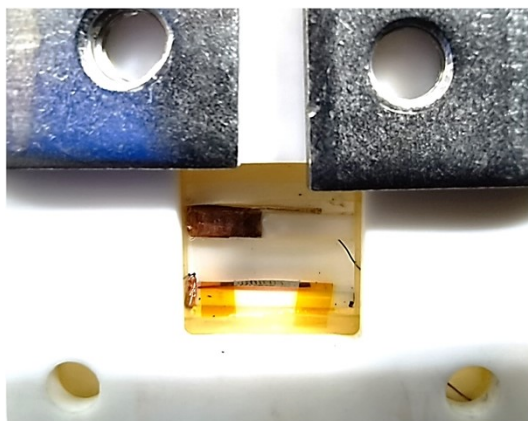

**Figure S28.** Photography of the in-situ optical dendrite testing mold.

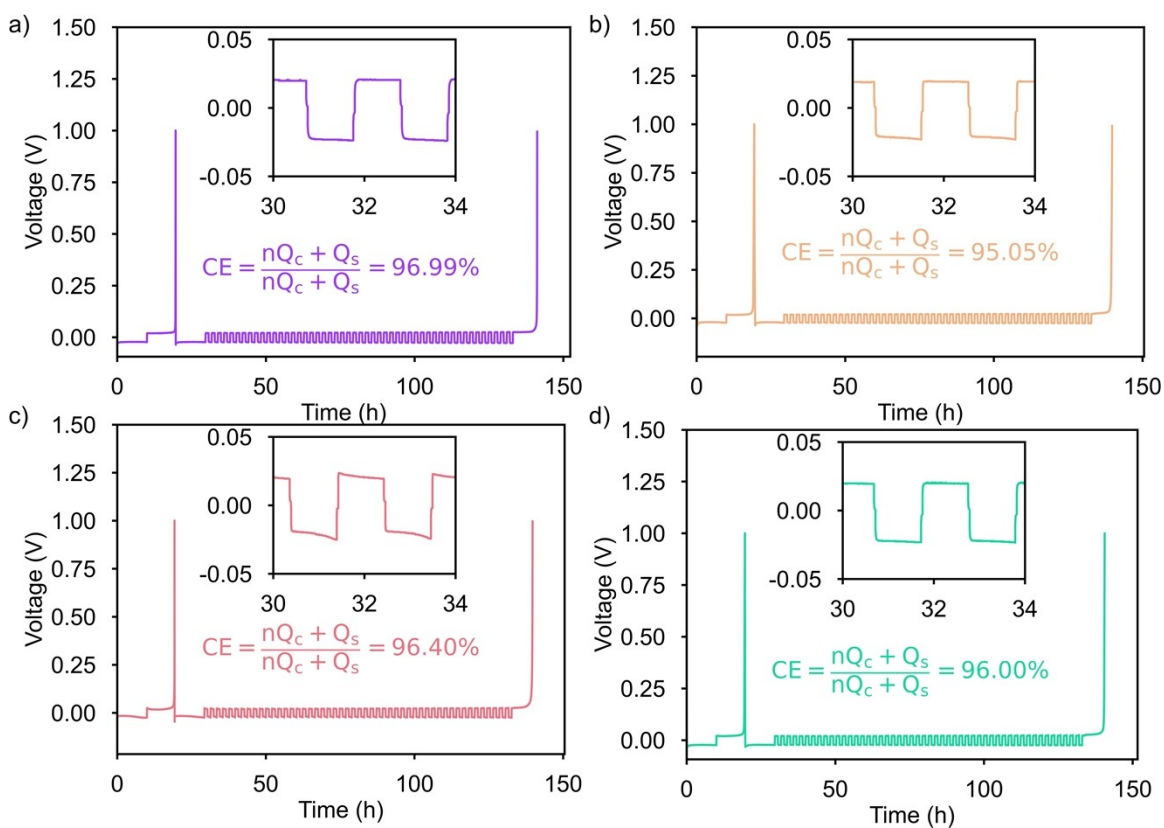

**Figure S29.** Coulombic efficiencies for (a) NC, (b) Cu foil, (c) Fe-SAs and (d) Cr-SAs in Aurbach CE test.

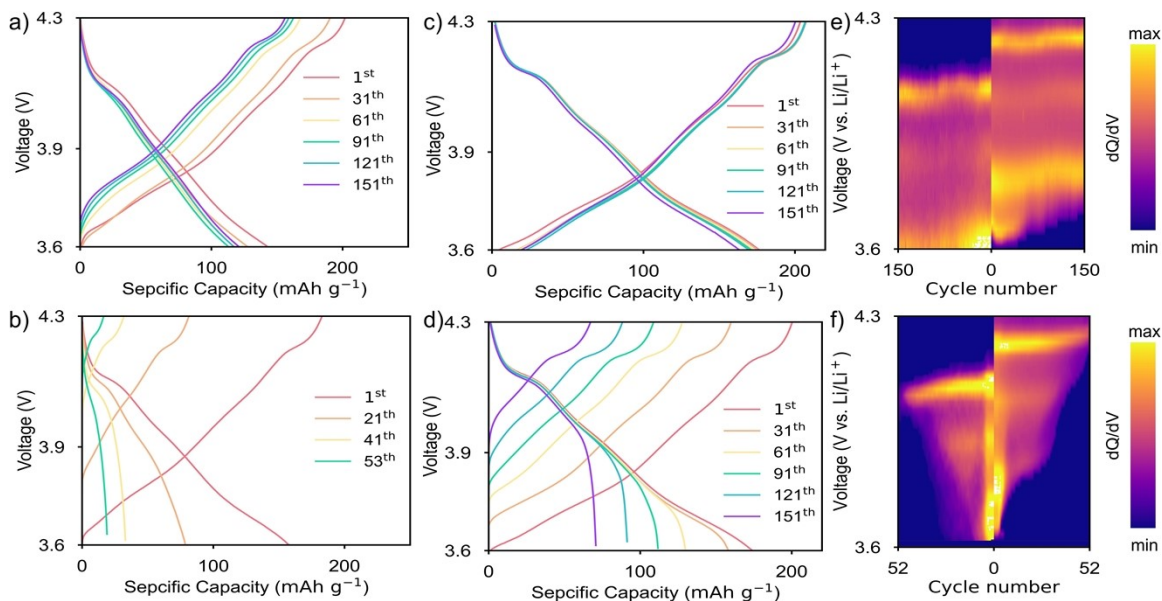

**Figure S30.** Charge-discharge curves for (a) NCM811||HBSA-Co SAs (b) NCM811||Cu (c) NCM811||Li<sup>c</sup>-HBSA-Co SAs and (d) NCM811||Li<sup>c</sup>-Cu full cells. Differential capacity heatmaps for (e) HBSA-Co SAs||NCM811 and (f) Cu||NCM811 full cells.

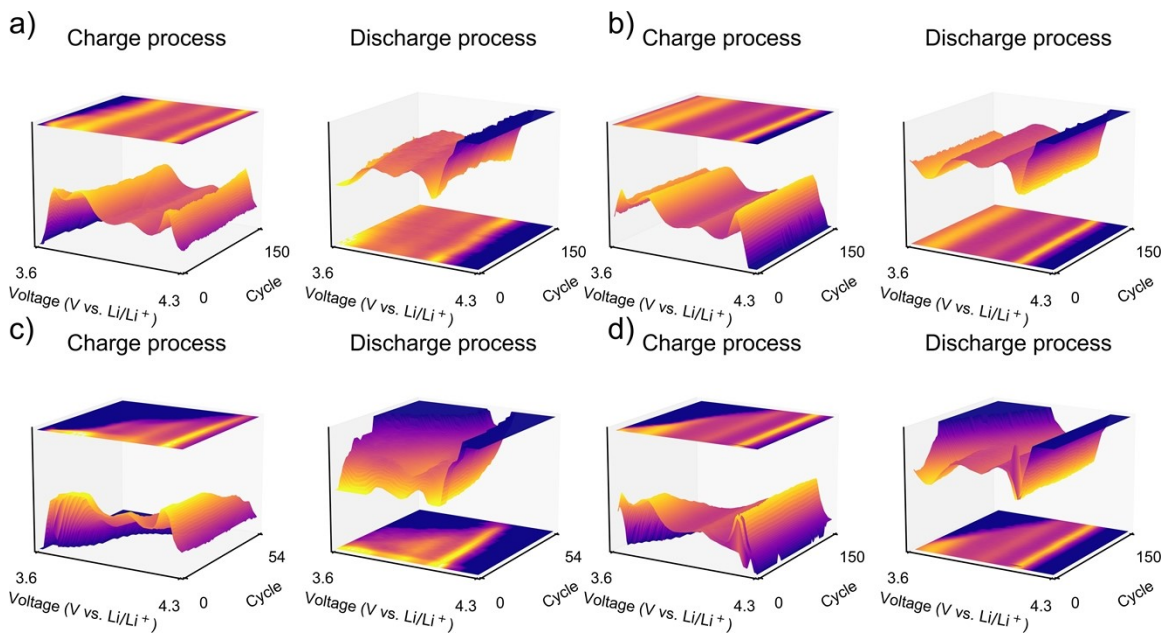

**Figure S31.** 3D differential capacity curve of (a) NCM811 || HBSA-Co SAs (b) NCM811 || Cu (c) NCM811 || Li<sup>c</sup>-HBSA-Co SAs and (d) NCM811 || Li<sup>c</sup>-Cu full cells.

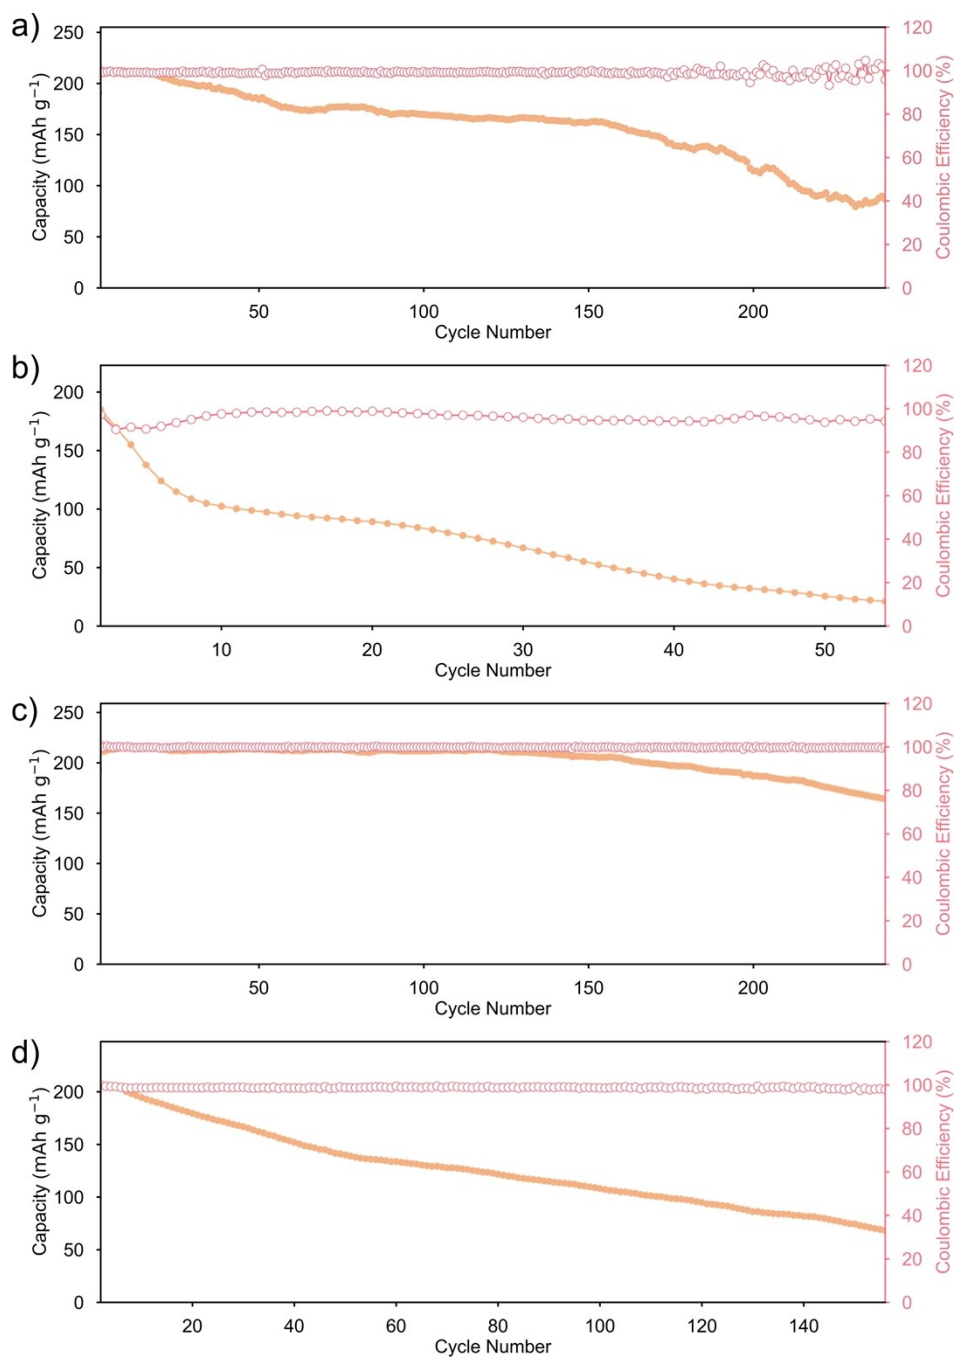

**Figure S32.** Cycling performance of (a) NCM811 ||HBSA-Co SAs (b) NCM811 ||Cu (c) NCM811 ||HBSA-Co SAs at N/P ratio of 1 (d) NCM811 ||Cu at N/P ratio of 1.

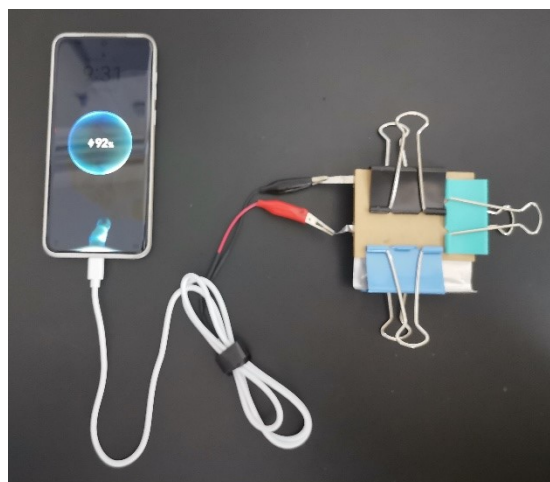

**Figure S33.** Charging a smartphone using an HBSA-Co SAs pouch cell.
